# Supplementary material for: Gold nanoparticles supported on layered TiO2–RGO hybrid as an enhanced and recyclable catalyst for microwave-assisted hydration reaction
Source: Royal Society of Chemistry journal article supplement (doi:10.1039/c6ra08021a), 2016-01-01
Supplement: c6ra08021a1.pdf [file c6ra08021a1.pdf]

*Electronic Supplementary Information*

Gold Nanoparticles Supported on Layered TiO<sub>2</sub>–RGO

Hybrid as an Enhanced and Recyclable Catalyst for

Microwave-assisted Hydration Reaction

*Yunfeng Cheng,<sup>a</sup> Qingshan Zhao,<sup>a,b</sup> Yang Li,<sup>a</sup> Wenchao Peng,<sup>a</sup> Guoliang Zhang,<sup>a</sup> Fengbao Zhang<sup>\*a</sup> and Xiaobin Fan<sup>\*a</sup>*

<sup>a</sup> School of Chemical Engineering and Technology, State Key Laboratory of Chemical Engineering, Collaborative Innovation Center of Chemical Science and Engineering, Tianjin University, Tianjin 300072, China

<sup>b</sup> College of Chemical Engineering, State Key Laboratory of Heavy Oil Processing, China University of Petroleum (East China), Qingdao 266580, China

Email: xiaobinfan@tju.edu.cn; fbzhang@tju.edu.cn

## 1. Preparation of the Controlling Catalysts

**Preparation of Au–RGO.** 240 mg GO was dispersed in 100 mL isopropanol by sonication for 1 h, and the mixture was kept stirring for another 2 h. 0.5 g glucose and 0.5 g sodium citrate were added into the suspension. After sonication for another 5 min, 1.8 mL chloroauric acid ( $\text{HAuCl}_4$ ) (0.02 M) was added to this mixture, and it was stirred for 4 h at room temperature. The resulting mixture was centrifugated and washed with deionized water three times, followed by freeze-drying.

**Preparation of Au–TiO<sub>2</sub>.** To prepare TiO<sub>2</sub>, 3 mL tetrabutyl titanate was dispersed in 100 mL isopropanol by sonication for 1 h. Subsequently, 3 mL deionized water was added dropwise, and the mixture was kept stirring for another 2 h. The solution was then transferred into a 150 mL Teflon-lined stainless steel autoclave and heated at 180 °C for 8 h. The as-prepared TiO<sub>2</sub> was purified by centrifugation and washing with ethanol and deionized water three times and then dispersed in 100 mL deionized water with sonication for 0.5 h. To prepare Au deposited on TiO<sub>2</sub> (Au–TiO<sub>2</sub>), 0.5 g glucose and 0.5 g sodium citrate were added into the suspension. After sonication for another 5 min, 0.5 mL chloroauric acid ( $\text{HAuCl}_4$ ) (0.02 M) was added to this mixture, and it was stirred for 4 h at room temperature. The resulting mixture was centrifugated and washed with deionized water three times, followed by freeze-drying.

**Preparation of Au–TiO<sub>2</sub>–RGO-1.** Au–TiO<sub>2</sub>–RGO-1 was prepared by the same method as Au–TiO<sub>2</sub>–RGO only with different  $\text{HAuCl}_4$  addition (3.5 mL, 0.02 M).

**Preparation of Au–TiO<sub>2</sub>–RGO-2.** Au–TiO<sub>2</sub>–RGO-2 was prepared by the same method as Au–TiO<sub>2</sub>–RGO only with different  $\text{HAuCl}_4$  addition (1.0 mL, 0.02 M).

## 2. Supplementary Figure

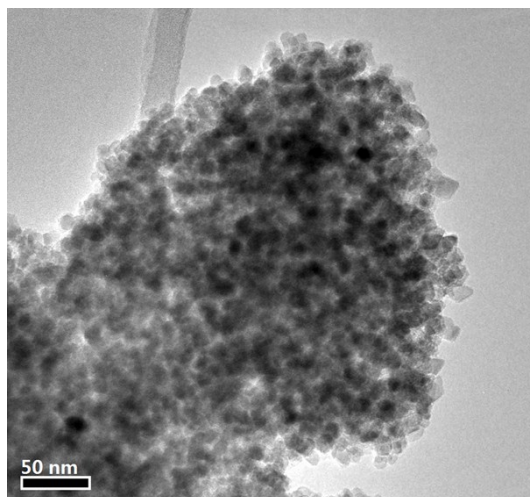

Figure S1. TEM spectrum of Au-TiO<sub>2</sub>.

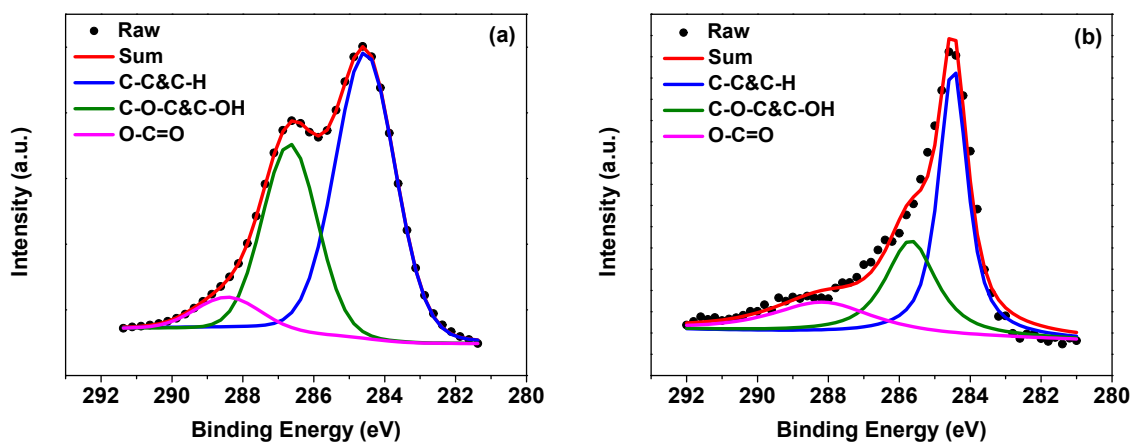

Figure S2. C 1s XPS spectra of (a) GO and (b) Au-TiO<sub>2</sub>-RGO.

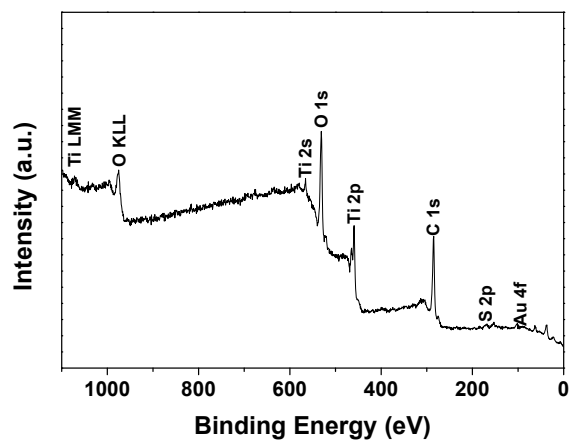

**Figure S3.** Full range XPS spectrum of Au-SO<sub>4</sub><sup>2-</sup>/TiO<sub>2</sub>-RGO after 5 cycles.
